# Supplementary material
Source: PubMed Central journal article supplement (PMC4587456)
Supplement: supp_pp.15.00649_PP2015-00649R1_Supplemental_Figure_2.pdf [file supp_pp.15.00649_PP2015-00649R1_Supplemental_Figure_2.pdf]

## Supplemental Figure S2

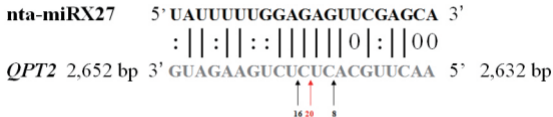

**Figure S2.** Validating nta-miRX27-mediated cleavage of the predicted target site (the first one at exon #2 in Fig. S1) using degradome data from roots of topping-treated tobacco plants. Base pairing between nta-miRX27 and its target *QPT2* is shown, in which a vertical line means a Watson-Crick pair, two dots represent a G-U pair and 0 represents mismatch. The numbers below the alignment indicate the numbers of degradomic reads at the positions indicated. The expected cleavage site is indicated by a red arrow.
