# Supplementary material
Source: PubMed Central journal article supplement (PMC4587456)
Supplement: supp_pp.15.00649_PP2015-00649R1_Supplemental_Table_1.pdf [file supp_pp.15.00649_PP2015-00649R1_Supplemental_Table_1.pdf]

1 **Supplemental Table S1 :Summary of predicted and identified novel miRNAs targeting nicotine pathway genes**

| MiRNA<br>accession | Mature sequences (5'-3') | Mature<br>length | Precursor<br>length | MFE/<br>kcal/<br>mol | Predicted<br>target | Expression abundance<br>(RPM*) |      | RT-qPCR<br>analysis |
|--------------------|--------------------------|------------------|---------------------|----------------------|---------------------|--------------------------------|------|---------------------|
|                    |                          |                  |                     |                      |                     | root                           | leaf |                     |
| nta-miRX13         | AGTGTATAGCTATAAATAGGGACC | 24               | 167                 | -90.8                | PMT2                | 0.3                            | 0.2  | No                  |
| nta-miRX17         | CCCCACTTGTGGGATTATACTGGG | 24               | 153                 | -75.2                | QPT1                | 0.5                            | 2.5  | Yes                 |
| nta-miRX19         | CGGATCTCTTGGCGGAAAGAC    | 21               | 85                  | -40.6                | NAC_148             | 4.5                            | 5.6  | Yes                 |
| nta-miRX20         | CGTTGAAGTGGCAAGGATGAC    | 21               | 169                 | -76.4                | CYP82E4             | 1.0                            | 0.3  | Yes                 |
| nta-miRX27         | TATTTTTGGAGAGTTCGAGCA    | 21               | 131                 | -65.5                | QPT2                | 0.5                            | 22.0 | Yes                 |

2 **Supplemental Table S1. Summary of predicted and identified novel miRNAs targeting nicotine pathway genes.**\*RPM: Repeat normalized  
3 reaSummary of predictSummary of predicted and identified novel miRNAs targeting nicotine pathway geneed and identified novel miRNAs  
4
