# Supplementary material
Source: PubMed Central journal article supplement (PMC4587456)
Supplement: supp_pp.15.00649_PP2015-00649R1_Supplemental_Table_2.pdf [file supp_pp.15.00649_PP2015-00649R1_Supplemental_Table_2.pdf]

## 1 Supplemental Table S2 :Primers used in plasmid construction and other experiments in this study

| Primer Name                    | Primer Sequence(5'—3')                                            | Purpose                                                               |
|--------------------------------|-------------------------------------------------------------------|-----------------------------------------------------------------------|
| Poly(T) adapter                | GCGAGCACAGAATTAATACGACTCACTATAGGTTTTTTTTTTTTTVN                   | For miRNAs RT                                                         |
| RT-q-PCR-miR-R                 | GCGAGCACAGAATTAATACGAC                                            | Universal Reverse primer for RT-qPCR analysis for nta-miRNAs          |
| nta-miRX17-F <sup>a</sup>      | <u>CCCCACTTGTGGGATTATACTGGG</u>                                   | Relative RT-qPCR analysis ofnta-miRX17                                |
| nta-miRX27-F <sup>a</sup>      | <u>TATTTTTGGAGAGTTCGAGCA</u>                                      | Relative RT-qPCR analysis ofnta-miRX27                                |
| nta-miRX20-F <sup>a</sup>      | <u>CGTTGAAGTGGCAAGGATGAC</u>                                      | Relative RT-qPCR analysis ofnta-miRX20                                |
| nta-miRX19-F <sup>a</sup>      | <u>CGGATCTCTTGGCGGAAAGAC</u>                                      | Relative RT-qPCR analysis ofnta-miRX19                                |
| M-5S RNA-F                     | TAAGGTAGCGGCGAGACGAGC                                             | Relative RT-qPCR analysis ofmitochondrial 5S RNA                      |
| NtGAPDH-q-F                    | GCAGTGAACGACCCATTTATCTC                                           | Relative RT-qPCR analysis of NtGAPDH                                  |
| NtGAPDH-q-R                    | AACCTTCTTGGCACCACCCT                                              | Relative RT-qPCR analysis of NtGAPDH                                  |
| QPT1-q-F                       | CTTAAGGGACTACTTTGAACTTATCC                                        | Relative RT-qPCR analysis of QPT1                                     |
| QPT1-q-R                       | CTAAAGAAACCTTGGTGCTGTAATTG                                        | Relative RT-qPCR analysis of QPT1                                     |
| QPT2-q-F                       | CCTTGAAGTTGGAAGGCGTAC                                             | Relative RT-qPCR analysis of QPT2                                     |
| QPT2-q-R                       | CATAAGGTTGGAAGAGCCATCTG                                           | Relative qRT-PCR analysis of QPT2                                     |
| CYP82E4-q-F                    | CCACCGAAAATCCCCGGAGG                                              | Relative RT-qPCR analysis of CYP82E4                                  |
| CYP82E4-q-R                    | GGCGTCATTGTAGAGAAACAGTC                                           | Relative RT-qPCR analysis of CYP82E4                                  |
| NAC_148-q-F                    | ACACGTTTATTCTAGAACCCGCC                                           | Relative RT-qPCR analysis of NAC_148                                  |
| NAC_148-q-R                    | GCAATTCACCGCTGCCATTC                                              | Relative RT-qPCR analysis of NAC_148                                  |
| eTMX27-q-F                     | ATAGAAGCCGTTGGGGTAGTGAAC                                          | Relative RT-qPCR analysis of eTMX27                                   |
| eTMX27-q-R                     | ACTCATATCCTCGGGCGAACATC                                           | Relative RT-qPCR analysis of eTMX27                                   |
| eTMX27-Full-F <sup>b</sup>     | CGGGATCCGTCACGTGTTCTCGACTTTTC                                     | pCHF3-35S-nta-eTMX27, for transgenic over-expression of nta-eTMX27    |
| eTMX27-Full-R <sup>b</sup>     | GCGTCGACCAATACACTCATAGACATTATAC                                   | pCHF3-35S-nta-eTMX27, for transgenic over-expression of nta-eTMX27    |
| eTMX27-A-F <sup>b</sup>        | <u>TCCGAGCTCGAAGCCGTTGGGGTAGTGAAC</u>                             | pCHF3-35S-ds-nta-eTMX27, for transgenic down-regulation of nta-eTMX27 |
| eTMX27-intron-A-R              | ATCAGACTTACAACGTCGTGTGTGTCATTTGACTG                               | pCHF3-35S-ds-nta-eTMX27, for transgenic down-regulation of nta-eTMX27 |
| eTMX27-intron-B-F              | CAGTCAAATGACACACACGACGTTGTAAGTCTGAT                               | pCHF3-35S-ds-nta-eTMX27, for transgenic down-regulation of nta-eTMX27 |
| Intron-B-R                     | GGATCCGCTCTATCTGCTGGGTCCAAATC                                     | pCHF3-35S-ds-nta-eTMX27, for transgenic down-regulation of nta-eTMX27 |
| eTMX27-C-F <sup>b</sup>        | <u>CGGGATCCCGTGTGTGTCATTTGACTG</u>                                | pCHF3-35S-ds-nta-eTMX27, for transgenic down-regulation of nta-eTMX27 |
| eTMX27-C-R <sup>b</sup>        | <u>GCGTCGACGAAGCCGTTGGGGTAGTGAAC</u>                              | pCHF3-35S-ds-nta-eTMX27, for transgenic down-regulation of nta-eTMX27 |
| nta-miRX27-gene-F <sup>b</sup> | <u>CGGGATCCCAAGCTATGTTGCTCGGAC</u>                                | pCHF3-35S-nta-miRX27, for transgenic over-expression of nta-miRX27    |
| nta-miRX27-gene-R <sup>b</sup> | GCGTCGACTGAGCTACGTTGCTCGAACTC                                     | pCHF3-35S-nta-miRX27, for transgenic over-expression of nta-miRX27    |
| STTMX27-F <sup>a,c</sup>       | <u>CGGGATCC</u> , <u>TGCTCGAACTCCTATCCAAAAATAGTTGTTGTTGTTATGG</u> | pCHF3-35S-STTMX27, for transgenic destruction of nta-miRX27           |
| STTMX27-R <sup>a,c</sup>       | <u>GCGTCGAC</u> , <u>TATTTTTGGATAGGAGTTCGAGCAATTCTTCTTTAGACCA</u> | pCHF3-35S-STTMX27, for transgenic destruction of nta-miRX27           |
| STTM-48 nt                     | GTTGTTGTTGTTATGGTCTAATTTAAATATGGTCTAAAGAAGAAGAAT                  | As STTMX27 template                                                   |
| QPT2-1R-New                    | CGCCATCATTTACATACTCCACTCCAC                                       | 5'RACE analysis for the first cleavage site of QPT2                   |
| QPT2-2R-New                    | CCAAGATGTAAGCAGGGTGTG                                             | 5'RACE analysis for the first cleavage site of QPT2                   |
| QPT-3R                         | CTTCCAACCTCAAGGGCGAGC                                             | 5'RACE analysis for the second cleavage site of QPT2                  |
| QPT-4R                         | GCTCATGCTCGTTTTGTACGCC                                            | 5'RACE analysis for the second cleavage site of QPT2                  |

2 Supplemental Table S2.Primers used in plasmid construction and other experiments in this study.<sup>a</sup>, MiRNAequence is underlined; <sup>b</sup>,

3 Restriction site used for cloning is underlined; <sup>c</sup>, STTM mimic sequence is underlined.
